# Supplementary material for: Connexin 26 (GJB2) Gene Mutations Linked With Autosomal Recessive Nonsyndromic Sensorineural Hearing Loss in Iraqi Population.
Source: Research Square preprint supplement (doi:10.21203/rs.3.rs-270492/v2), 2021-05-25

# Additional file1: Figure S1. Restriction analysis by BstI enzyme for PCR product of c.35delG mutation in GJB2 gene in 2% agarose gel stained with ethidium bromide by electrophoresis. Lane M: DNA Ladder. Lane 3, 5, 6, and 7 are heterozygous genotype and Lane 1, 2, 4, 8, 9 and 10 homozygous genotype of mutant alleles. This was visualized by UV illuminator instrument.

#
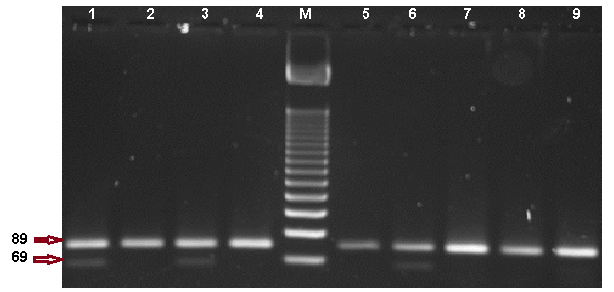

Supplement: Supplementary file 1 [file 3c27342b65deb6db7c364c8b.docx]
